**Identification and functional characterization of an ovarian aquaporin from the cockroach *Blattella germanica* L. (Dictyoptera, Blattellidae)**

Alba Herraiz, François Chauvigné, Joan Cerdà, Xavier Bellés and Maria-Dolors Piulachs

10.1242/jeb.067009

There was an error published in *J. Exp. Biol.* **214**, 3630-3638.

The affiliation for Xavier Bellés was inadvertently missing from the author list. It should have read:

<sup>1</sup>Institut de Biologia Evolutiva (CSIC-UPF) and LINC-Global, Passeig Marítim de la Barceloneta 37-49, 08003 Barcelona, Spain

We apologise to authors and readers for any inconvenience this error may have caused.
